# Supplementary material for: Min-redundancy and max-relevance multi-view feature selection for predicting ovarian cancer survival using multi-omics data
Source: PubMed Central journal article supplement (PMC6157248; doi:10.1186/s12920-018-0388-0), 2018-09-14

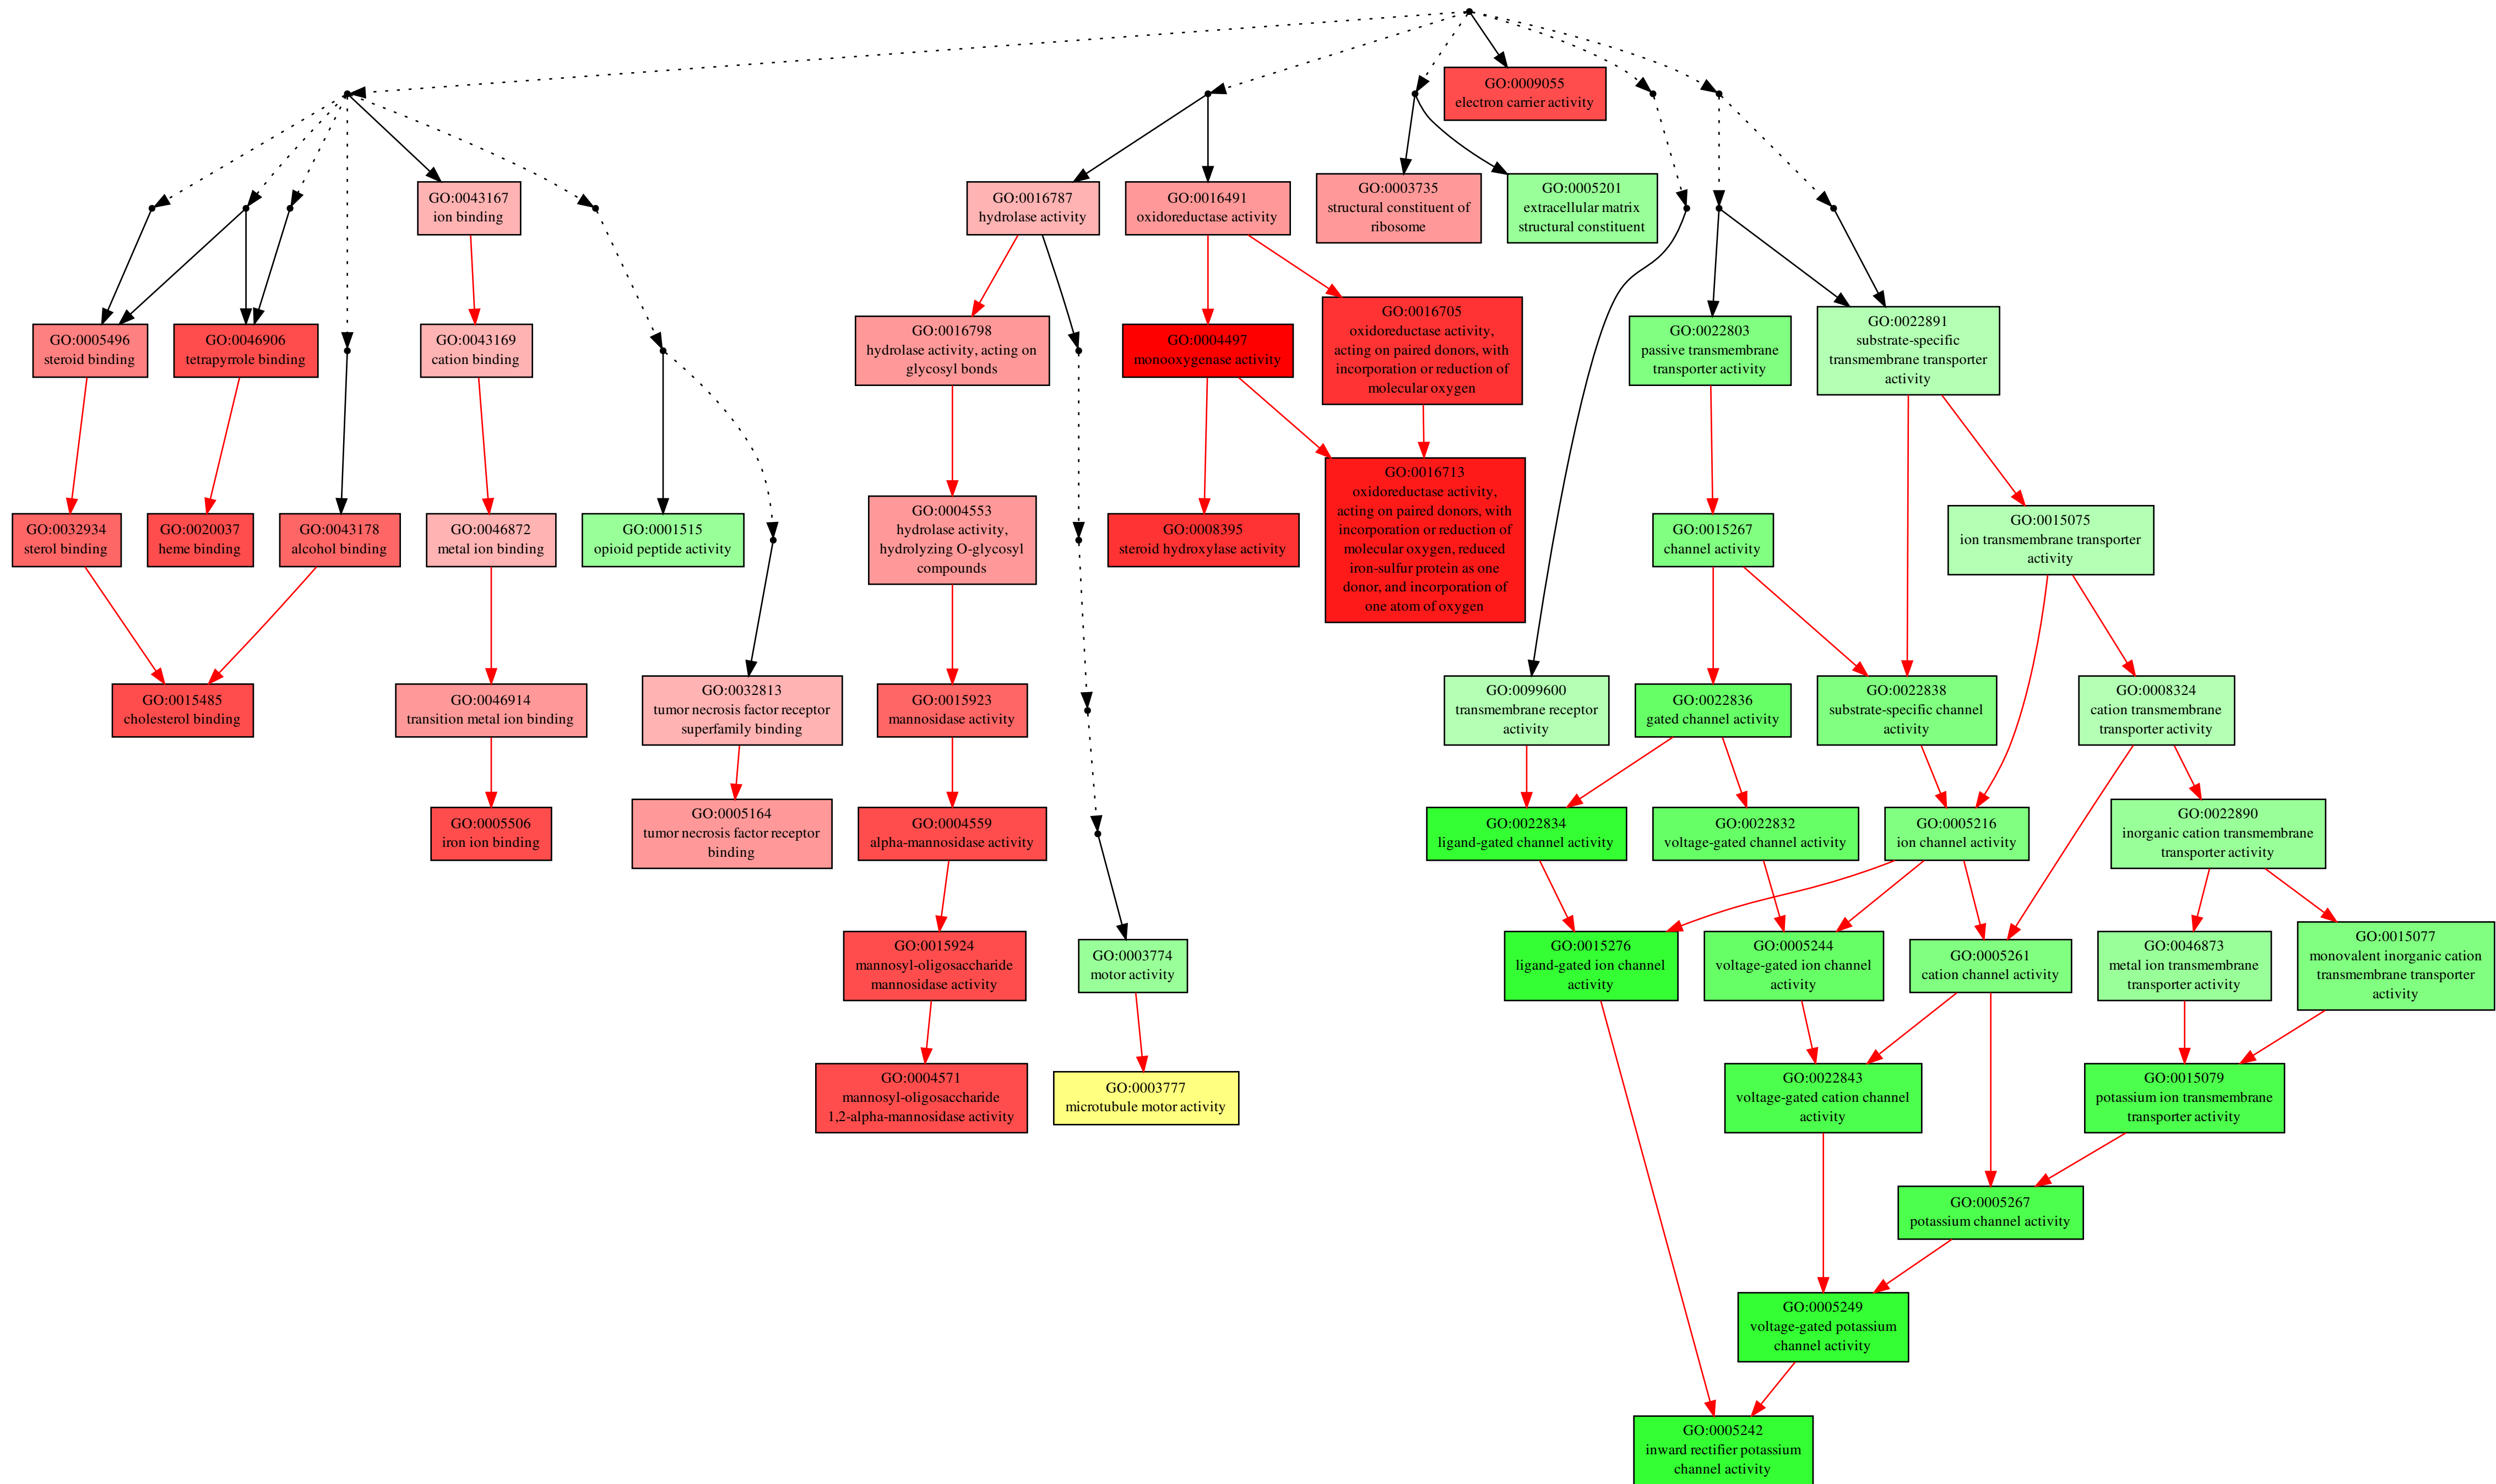

Supplement: 12920_2018_388_MOESM5_ESM.pdf [file 12920_2018_388_MOESM5_ESM.pdf]
